# Supplementary material for: Variant in the PLCG2 Gene May Cause a Phenotypic Overlap of APLAID/PLAID: Case Series and Literature Review
Source: J Clin Med. 2022 Jul 27;11(15):4369. doi: 10.3390/jcm11154369 (PMC9368933; doi:10.3390/jcm11154369)
Supplement: Supplementary file 1 [file jcm-11-04369-s001.zip › jcm-1833379-Supplementary.pdf]

## **Supplementary material**

### **S1: Targeted exome sequencing.**

#### **Exome sequencing and variant filtering:**

Exome sequencing was performed on genomic DNA from the four affected siblings. Coding regions were enriched using SureSelect XT Human All Exon V7 kits (Agilent Technologies, Santa Clara, CA, USA) and prepared libraries were sequenced as 2x100 bp paired-end reads on a NovaSeq 6000 system (Illumina, San Diego, CA, USA) to a 93.95 to 120.06 X coverage of the target region. Additional quality metrics on the performed experiments are shown in Table 1.

Generated sequences were analyzed using the megSAP pipeline (<https://github.com/imgag/megSAP>). Different filtering steps were performed to prioritize putatively clinically relevant DNA variants including a search for rare (MAF < 0.01 % in gnomAD (<https://gnomad.broadinstitute.org>; assessed January 2022) and an in-house database) heterozygous non-synonymous changes shared by all affected individuals. This approach left a total of 17 heterozygous variants in 16 genes. Of these, 6 have been previously associated with human diseases, namely *PTCH2*, *POMGNT1*, *EPRS1*, *TREX1*, *PLCG2*, and *HCLS*. Of these, *PLCG2* was the only gene that has been previously reported in the context of the clinical features observed in the investigated family with an autosomal dominant mode of inheritance. Datasets were analyzed by two trained diagnostic molecular geneticists, revealing no other likely disease-causing variants.

*Table S1: Exome sequencing quality metrics of patients 2 – 5.*

| <b>parameter</b>                   | <b>value<br/>(patient 2)</b> | <b>value<br/>(patient 3)</b> | <b>value<br/>(patient 4)</b> | <b>value<br/>(patient 5)</b> |
|------------------------------------|------------------------------|------------------------------|------------------------------|------------------------------|
| Q20 read percentage                | 99.97                        | 99.97                        | 99.97                        | 99.98                        |
| gc content percentage              | 50.44                        | 50.67                        | 50.98                        | 50.89                        |
| variant count                      | 43226                        | 43397                        | 43326                        | 44273                        |
| known variants percentage          | 99.66                        | 99.66                        | 99.66                        | 99.65                        |
| transition/transversion<br>ratio   | 2.61                         | 2.63                         | 2.63                         | 2.61                         |
| mapped read percentage             | 99.16                        | 99.49                        | 99.63                        | 99.63                        |
| on-target read percentage          | 68.62                        | 69.38                        | 69.99                        | 69.27                        |
| properly-paired read<br>percentage | 97.97                        | 98.44                        | 98.78                        | 98.74                        |
| insert size                        | 197.77                       | 199.09                       | 199.41                       | 198.34                       |
| target region read depth           | 98.73                        | 110.26                       | 93.95                        | 120.06                       |
| target region 20x<br>percentage    | 94.39                        | 95.02                        | 93.97                        | 95.55                        |
| bases sequenced (MB)               | 11992.05                     | 13600.44                     | 11277.94                     | 14539.99                     |

| Antibody        | Clone | Fluorochromes                     | Company        |
|-----------------|-------|-----------------------------------|----------------|
| anti-human CD27 | L128  | Allophycocyanin (APC)             | BD Biosciences |
| anti-human CD38 | HB7   | Fluorescein isothiocyanate (FITC) | BD Biosciences |
| anti-human CD19 | 4G7   | PerCP                             | BD Biosciences |
| anti-human IgD  | IA6-2 | Phycoerythrin (PE)                | BD Biosciences |

## S2: Immunological testing.

### Cytokine staining:

To measure cytokine production, PBMCs (peripheral blood mononuclear cells) were stimulated with phorbol 12-myristate 13-acetate (PMA, 50 ng/ml, Merck) and ionomycin (1 µg/ml, Merck) in the presence of Brefeldin A (GolgiPlug, BD Biosciences) for 4 h at 37°C. Then cells were harvested and stained with antibodies against CD45RO, CD3 and CD4 for 15 min at room temperature. Subsequently, the Cytofix/Cytoperm™ Plus Fixation/Permeabilization Kit (BD Biosciences) was used for intracellular staining of IL-2, IL-4, IL-17 and IFN-γ. Cells were acquired on a Navios flow cytometer (Beckman Coulter).

| Antibody          | Clone       | Fluorochromes | Company         |
|-------------------|-------------|---------------|-----------------|
| anti-human CD3    | SK7         | PerCP         | BD Biosciences  |
| anti-human CD45RO | UCHL1       | PE-CF594      | BD Biosciences  |
| anti-human CD4    | SFCH12T4D11 | PC7           | Beckman Coulter |
| anti-human IL-4   | 8D4-8       | APC           | eBioscience     |
| anti-human IL-17  | eBio64DEC17 | PE            | eBioscience     |
| anti-human IFN-γ  | B27         | FITC          | BD Biosciences  |
| anti-human IL-2   | 5344.111    | PE            | BD Biosciences  |

### T-cell proliferation:

For analysis of T-cell proliferation, PBMCs were labeled with CFSE (Molecular Probes) for 15 min at 37°C. Cells were seeded into a 96-well flat bottom plate and left untreated or stimulated with PHA (2.5 µg/ml, Remel), 300 ng/ml plate bound anti-CD3 antibody (Clone OKT3, eBiosciences), 1000 ng/ml plate bound anti-CD3 antibody or 300 ng/ml plate bound anti-CD3 antibody and 1 µg/ml soluble anti-CD28 antibody (Clone CD28.2, BD Biosciences). Cells were harvested after 4-6 days, stained with antibodies against CD8 and CD4 and acquired on a Navios flow cytometer (Beckman Coulter).

| Antibody       | Clone       | Fluorochromes | Company         |
|----------------|-------------|---------------|-----------------|
| anti-human CD4 | SFCH12T4D11 | PC7           | Beckman Coulter |
| anti-human CD8 | RPA-T8      | APC           | BD Biosciences  |

### S3: Additional variant information.

| Gene  | Transcript-ID   | Variant               | Status       | gnomAD frequency | Varsome classification | ClinVar interpretation                                      |
|-------|-----------------|-----------------------|--------------|------------------|------------------------|-------------------------------------------------------------|
| PLCG2 | ENST00000359376 | c.77>T,<br>p.Thr26Met | heterozygote | 0.0006           | benign                 | Conflicting<br>(VUS, 2x,<br>benign1x, likely<br>benign 1x ) |

Abbreviation: PLCG2 Phospholipase-Gamma-2, VUS variant of uncertain significance

### S4: Modelling of the PLCG2 protein structure.

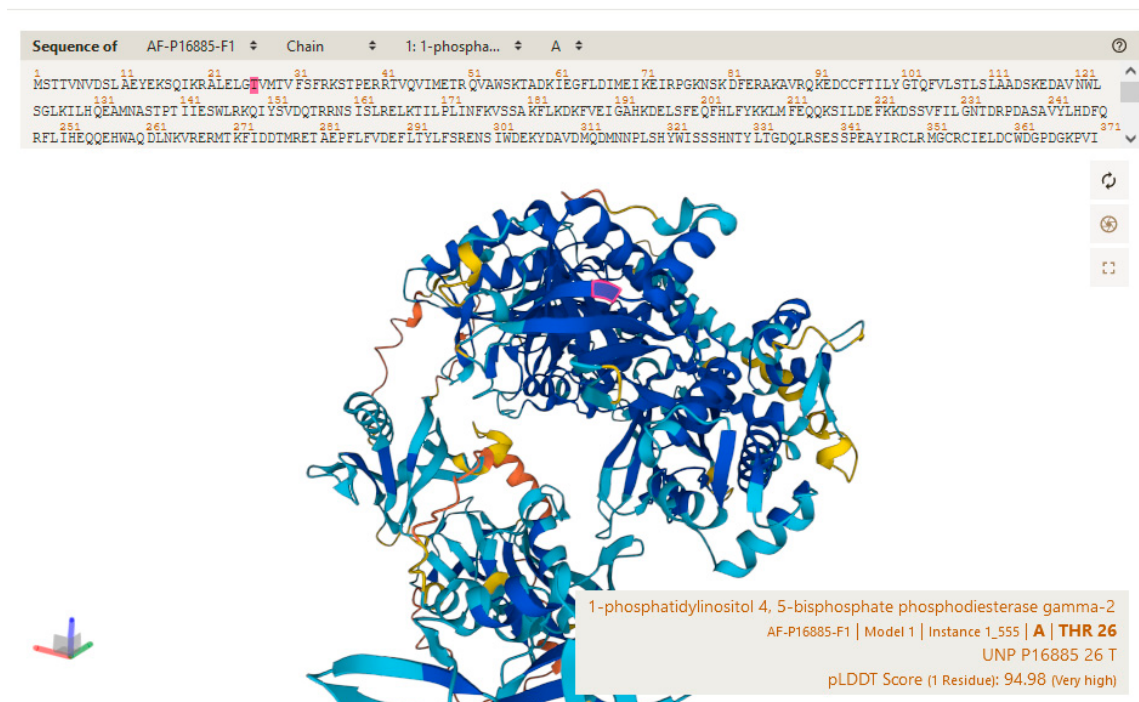

source: <https://alphafold.ebi.ac.uk/entry/P16885>

AlphaFold predicts for the missense changes a location within a beta-sheet structure with very high confidence (pLDDT > 90). The aliphatic amino acid Threonine is replaced by the amino acid Methionine, potentially disrupting the secondary structure. However, the amino acid changes are not predicted to be highly damaging (CADD-score = 21, CADD version 1.5).
